# Supplementary material
Source: ML conference proceedings conference paper supplement (https://proceedings.mlr.press/v38/shariff15.html)
Supplement: Supplementary file [file shariff15-supp.pdf]

## SUPPLEMENTARY MATERIAL — PROOFS

For any topological space  $X$ , let  $\mathcal{K}(X)$  be the class of continuous real-valued functions from  $X$  having compact support: for any  $f \in \mathcal{K}(X)$  there is some compact  $K \subset X$  such that  $f$  is zero outside  $K$ . Any measure on  $X$  is always finite for any function on  $\mathcal{K}(X)$  and to show that two measures are the same, it is sufficient that they agree for all functions in  $\mathcal{K}(X)$ .

Suppose from now on that Assumptions 1 and 2 hold:  $X$  is a topological space and  $G$  is a topological group acting continuously and *properly* on  $X$ , with both  $X$  and  $G$  Hausdorff and locally compact. Recall that the requirement that the action is proper means that the continuous function  $\theta : X \times G \rightarrow X \times X$  defined by  $(x, g) \mapsto (x, gx)$  is such that for any compact set  $K \subset X \times X$ , the pre-image  $\theta^{-1}(K)$  of  $K$  is compact in  $X \times G$ .<sup>6</sup> For any  $x \in X$ , let  $G_x := \{g \in G \mid gx = x\}$  be the *isotropy subgroup* of  $G$  at  $x$  and let  $\pi_x : G \rightarrow G/G_x$  be the natural quotient map from  $G$  to the coset space  $G/G_x$ . Because  $G$  acts properly on  $X$ , each  $G_x$  is compact.

The image of  $X \times G$  under  $\theta$  is the set  $E := \{(x, gx) \mid x \in X, g \in G\}$ , which is closed in  $X \times X$  because  $\theta$  is a proper (hence closed) map and  $X \times G$  is closed. If we restrict the codomain of  $\theta$  to  $E$ , it becomes a surjective, continuous, and closed map: it is a quotient map. In other words, any set  $U \subset E$  is open in the subspace topology inherited by  $E$  from  $X \times X$  if and only if  $\theta^{-1}(U)$  is open in  $X \times G$ . Further,  $\theta$  has the following universal property: if  $Z$  is any topological space and  $f : X \times G \rightarrow Z$  is a continuous function satisfying  $f(x, g) = f(x', g')$  whenever  $\theta(x, g) = \theta(x', g')$ , then there is a unique continuous function  $\bar{f} : E \rightarrow Z$  such that  $f = \bar{f} \circ \theta$ . We see that  $\theta(x, g) = \theta(x', g')$  if and only if  $x = x'$  and  $g' \in gG_x$  (i.e.,  $gx = g'x$ ). The equivalence classes under  $\theta$  are therefore sets of the form  $\{x\} \times gG_x$ .

Let  $\lambda$  be a  $\chi$ -invariant measure on  $X$  under the action of  $G$ , where  $\chi : G \rightarrow \mathbb{R}_+^\times$  is a continuous group homomorphism from  $G$  to the multiplicative group of the positive real numbers: for any measurable  $F \subset X$  and  $g \in G$ ,  $\lambda(gF) = \chi(g)\lambda(F)$ . Note that as a corollary we get that for any  $f \in \mathcal{K}(X)$ ,

$$\int f(gx) \lambda(dx) = \chi(g^{-1}) \int f(x) \lambda(dx). \quad (5)$$

Indeed, when  $f = \chi_U$ ,  $U \subset X$  measurable,  $\int f(gx) \lambda(dx) = \int \mathbb{1}\{gx \in U\} \lambda(dx) = \int \mathbb{1}\{x \in g^{-1}U\} \lambda(dx) = \lambda(g^{-1}U) = \chi(g^{-1})\lambda(U) = \chi(g^{-1}) \int \mathbb{1}\{x \in U\} \lambda(dx) = \chi(g^{-1}) \int f(x) \lambda(dx)$ , from which the result follows.

<sup>6</sup>More generally,  $f : X \rightarrow Y$  is said to be proper if  $f \circ \text{id}_Z : X \times Z \rightarrow Y \times Z$  is closed for every topological space  $Z$ , and a group is said to act properly if  $\theta$  (as defined above) is proper. Our definition coincides with this one because the domain and codomain of  $\theta$  are both locally compact.

Let  $\mu$  be a left Haar measure on  $G$ . Recall that this means that  $\mu(H) = \mu(gH)$  for any measurable  $H \subset G$  and  $g \in G$ . We will also need the *right modular character*  $\Delta_r^G$  of  $G$ . Recall that  $\Delta_r^G$  is the unique function from  $G$  to the positive reals such that  $\mu(Hg) = \Delta_r^G(g)\mu(H)$  for any measurable  $H \subset G$ . (The existence of  $\Delta_r^G$  follows since  $H \mapsto \mu(Hg)$  can be seen to be a left Haar measure on  $G$  and by the uniqueness of Haar measures up to a normalizing constant.) A well known fact, that we will need later, is that for any  $f \in \mathcal{K}(G)$ ,

$$\int f(g^{-1}) \mu(dg) = \int f(g) \Delta_r^G(g^{-1}) \mu(dg). \quad (6)$$

Finally, let  $\beta_x$  be a left Haar measure on  $G_x$ ; by the compactness of  $G_x$ ,  $\beta_x$  is also a right Haar measure and it is finite, and without loss of generality we can take it to be normalized.

For any  $x \in X$  and  $f \in \mathcal{K}(G)$ , we will make use of the following construction: define  $f'_x \in \mathcal{K}(G)$  by  $g \mapsto \int_{G_x} f(gh) \beta_x(dh)$ . For any  $g' \in gG_x$ , we have  $f'_x(g') = \int_{G_x} f(gg^{-1}g'h) \beta_x(dh) = f'_x(g)$  since  $\beta_x$  is invariant under a translation by  $g^{-1}g' \in G_x$ . Thus  $f'_x$  is constant on each coset  $gG_x$  and there is some  $f_x \in \mathcal{K}(G/G_x)$  such that  $f'_x = f_x \circ \pi_x$ . Because  $G_x$  is compact, there is a *quotient measure*  $\nu_x := \mu/\beta_x$  on  $G/G_x$  which satisfies  $\mu(f) = \nu_x(f_x)$  for any  $f \in \mathcal{K}(G)$ . Furthermore, because  $\beta_x$  is normalized,  $\nu_x = \pi_x(\mu)$ .

Let  $M, N$  be measurable spaces,  $\alpha : M \rightarrow N$  measurable,  $\rho$  a measure on  $M$ . The *push-forward measure*  $\alpha(\rho)$  on  $N$  is defined by  $\int f d\alpha(\rho) = \int f \circ \alpha d\rho$  for any  $f \in \mathcal{K}(N)$  or by  $\alpha(\rho)(F) = \rho(\alpha^{-1}(F))$  for any measurable  $F \subset N$ . From now on,  $\alpha(\rho)$  for  $\alpha$  an  $M \rightarrow N$  map,  $\rho$  a measure on  $M$  always means the push-forward of  $\rho$  under  $\alpha$ . In particular, the parentheses in a setting like this will never be used for grouping. To help parsing the formulae, we will also occasionally write  $f \cdot \rho$  to denote the measure whose density w.r.t.  $\rho$  is  $f$ , where  $\rho$  is a measure on  $M$  and  $f : M \rightarrow [0, \infty)$  is  $\rho$ -integrable.

Now consider a measure  $\Gamma$  on  $X \times G$  defined by  $\Gamma(dx, dg) := \gamma(x, g) \lambda(dx) \mu(dg)$ , having density  $\gamma$  with respect to  $\lambda \otimes \mu$ . Our goal is to construct the Radon-Nikodym derivative of the push-forward measure  $\theta(\Gamma)$  on  $E$  w.r.t. the push-forward measure  $\theta(\lambda \otimes \mu)$ . For this, take any  $f \in \mathcal{K}(X \times G)$  so that

$$\begin{aligned} \int f d\theta(\Gamma) &= \int f \circ \theta d\Gamma \\ &= \int_X \lambda(dx) \int_G \mu(dg) \gamma(x, g) f(\theta(x, g)) \\ &= \int_X \lambda(dx) \int_{G/G_x} \nu_x(dg) \int_{G_x} \beta_x(dh) \gamma(x, gh) f(\theta(x, gh)) \end{aligned}$$

$$= \int_X \lambda(dx) \int_{G/G_x} \nu_x(dg) f(\theta(x,g)) \int_{G_x} \beta_x(dh) \gamma(x,gh).$$

In the last equality,  $f \circ \theta$  can be taken outside the innermost integral because  $\theta(x,gh) = \theta(x,g)$  for any  $h \in G_x$ . Now define  $\gamma'(x,g) := \int_{G_x} \beta_x(dh) \gamma(x,gh)$ , so that  $\gamma'(x, \cdot)$  is constant on each coset  $gG_x$  and there is some  $\tilde{\gamma} : E \rightarrow \mathbb{R}$  such that  $\gamma' = \tilde{\gamma} \circ \theta$ :

$$\int f d\theta(\Gamma) = \int_X \lambda(dx) \int_{G/G_x} \nu_x(dg) f(\theta(x,g)) \tilde{\gamma}(\theta(x,g)).$$

The integrand of  $\nu_x$  is well-defined because it depends on  $g$  only through its coset  $\pi_x(g) = gG_x$ . Using the fact that  $\nu_x = \pi_x(\mu)$ , we can replace  $\nu_x$  by  $\mu$  in the above integral to get

$$\begin{aligned} \int f d\theta(\Gamma) &= \int f(\theta(x,g)) \tilde{\gamma}(\theta(x,g)) \lambda(dx) \mu(dg) \\ &= \int f \tilde{\gamma} d\theta(\lambda \otimes \mu). \end{aligned}$$

Thus we have shown that  $\theta(\gamma \cdot (\lambda \otimes \mu)) = \tilde{\gamma} \cdot \theta(\lambda \otimes \mu)$ , where  $\tilde{\gamma}(\theta(x,g)) := \int_{G_x} \gamma(x,gh) \beta_x(dh)$ .

We will be concerned with the operation of *transposition* on  $X \times X$ , defined by the map  $(x, x')^T := T(x, x') = (x', x)$ . We note that  $T$  is continuous and is its own inverse. Further,  $T$  maps the set  $E$  to itself: for any  $(x, gx) \in E$  we have  $T(x, gx) = (gx, x) = (gx, g^{-1}gx) \in E$ . Mirroring this definition of  $T$  restricted to  $E$ , we will define  $t : X \times G \rightarrow X \times G$  by  $(x, g) \mapsto (gx, g^{-1})$ , so that  $t$  is continuous and also its own inverse:  $t(t(x, g)) = t(gx, g^{-1}) = (g^{-1}gx, g) = (x, g)$ . Now note that if  $\theta(x, g) = \theta(x, g')$  (i.e.,  $gx = g'x$ ) then  $t(x, g) = (gx, g^{-1})$  and  $t(x, g') = (g'x, g'^{-1})$ , where  $g'^{-1}g'x = x = g^{-1}gx$  and thus  $\theta(t(x, g')) = \theta(t(x, g))$ . Conversely, if  $\theta(t(x, g)) = \theta(t(x', g'))$  then by the previous result  $\theta(t(t(x, g))) = \theta(t(t(x', g')))$ , and since  $t$  is its own inverse, we have shown that  $\theta(t(x, g)) = \theta(t(x', g')) \iff \theta(x, g) = \theta(x', g')$ . In other words,  $\theta \circ t : X \times G \rightarrow E$  is constant on the equivalence classes of  $\theta$ , so there is some continuous  $\tau : E \rightarrow E$  such that  $\theta \circ t = \tau \circ \theta$ ; we can verify that  $\tau$  is simply  $T$  restricted to  $E$ , i.e., the following diagram is commutative:

$$\begin{array}{ccccc} X \times G & \xrightarrow{\theta} & E & \hookrightarrow & X \times X \\ \uparrow t & & \uparrow T|_E & & \uparrow T \\ X \times G & \xrightarrow{\theta} & E & \hookrightarrow & X \times X \end{array}$$

Let us again take  $\Gamma = \gamma(\lambda \otimes \mu)$  and find the push-forward measure  $t(\Gamma)$ . Take  $f \in \mathcal{K}(X \times G)$ . Then,

$$\begin{aligned} \int f dt(\Gamma) &= \int f \circ t d\Gamma \\ &= \int f(gx, g^{-1}) \gamma(x, g) \lambda(dx) \mu(dg) \end{aligned}$$

changing  $x$  to  $g^{-1}x$  using Eq. (5)

$$= \int \chi(g^{-1}) f(x, g^{-1}) \gamma(g^{-1}x, g) \lambda(dx) \mu(dg)$$

changing  $g$  to  $g^{-1}$  using Eq. (6)

$$= \int \Delta_r^G(g^{-1}) \chi(g) f(x, g) \gamma(gx, g^{-1}) \lambda(dx) \mu(dg).$$

Thus  $t(\Gamma) = t(\gamma(\lambda \otimes \mu)) = \gamma_t(\lambda \otimes \mu)$  where  $\gamma_t(x, g) := \varphi(g)\gamma(t(x, g))$  and  $\varphi(g) = \chi(g)\Delta_r^G(g^{-1})$  for  $g \in G$ . Thus  $\gamma_t$  is a density for  $t(\Gamma)$  with respect to  $\lambda \otimes \mu$ , so we can apply our previous result to this distribution to get a density for  $\theta(t(\Gamma))$  with respect to  $\theta(\lambda \otimes \mu)$ : we get

$$\theta(t(\Gamma)) = \theta(\gamma_t(\lambda \otimes \mu)) = \tilde{\gamma}_t \cdot \theta(\lambda \otimes \mu),$$

where

$$\begin{aligned} \tilde{\gamma}_t(\theta(x, g)) &:= \int_{G_x} \gamma_t(x, gh) \beta_x(dh) \\ &\stackrel{(a)}{=} \int_{G_x} \varphi(gh) \gamma(t(x, gh)) \beta_x(dh) \\ &\stackrel{(b)}{=} \varphi(g) \int_{G_x} \gamma(ghx, h^{-1}g^{-1}) \beta_x(dh) \\ &\stackrel{(c)}{=} \varphi(g) \int_{G_x} \gamma(gx, g^{-1}gh^{-1}g^{-1}) \beta_x(dh) \\ &\stackrel{(d)}{=} \varphi(g) \int_{G_{gx}} \gamma(gx, g^{-1}h^{-1}) \beta_{gx}(dh) \\ &\stackrel{(e)}{=} \varphi(g) \int_{G_{gx}} \gamma(gx, g^{-1}h) \beta_{gx}(dh) \\ &\stackrel{(f)}{=} \varphi(g) \tilde{\gamma}(\theta(gx, g^{-1})) = \varphi(g) \tilde{\gamma}(T(\theta(x, g))). \end{aligned}$$

Here, the various equalities hold for the following reasons: (a) Definition of  $\gamma_t$ ; (b) Since  $\varphi$  is a group homomorphism,  $\varphi(gh) = \varphi(g)\varphi(h)$  and since  $G_x$  is compact,  $\varphi(h) = 1$  for any  $h \in G_x$ ; (c) By the definition of  $G_x$ ,  $hx = x$ ; (d)  $\beta_{gx}$  is the push-forward of  $\beta_x$  under the map  $c_g : h \mapsto ghg^{-1}$ . Indeed, if  $\hat{\beta} := c_g(\beta_x)$  then  $\hat{\beta}(U) = \beta_x(g^{-1}Ug)$  for  $U \subset G_{gx}$  measurable. Now, for any  $h \in G_{gx}$ ,  $hU = U$ , hence  $\hat{\beta}(hU) = \beta_x(g^{-1}hUg) = \beta_x(g^{-1}Ug) = \hat{\beta}(U)$  and thus  $\hat{\beta} = c_g(\beta_x)$  is a Haar-measure on  $G_{gx}$ . Thanks to the uniqueness of normalized Haar measures, we then have  $c_g(\beta_x) = \beta_{gx}$ ; (e) Since  $G_{gx}$  is compact,  $\beta_{gx}$  remains unchanged under the change of variables  $h \mapsto h^{-1}$ ; (f) Definition of  $\tilde{\gamma}$ .

**Theorem 3.** Let  $X, G, \lambda, \mu, (G_x)_{x \in X}, (\beta_x)_{x \in X}$  be as stated in this section. Then, for any  $\Gamma$  measure on  $X \times G$  that is absolute continuous w.r.t.  $\lambda \otimes \mu$ , with density  $\gamma$ , it holds that

$$\frac{d\theta(\Gamma)}{d\theta(\theta(\Gamma))}(x, gx) = \frac{\Delta_r^G(g) \tilde{\gamma}(x, gx)}{\chi(g) \tilde{\gamma}(gx, x)} \quad \text{where } x \in X, g \in G,$$

where  $\theta(x, g) = (x, gx)$  and  $T(x, x') = (x', x)$  for any  $x, x' \in X, g \in G$  and

$$\tilde{\gamma}(x, gx) = \int_{G_x} \gamma(x, gh) \beta_x(dh) \quad \text{where } x \in X, g \in G.$$

*Proof.*  $\varphi(\tilde{\gamma} \circ T)$  is a density for  $\theta(t(\Gamma))$  (and hence for  $T(\theta(\Gamma))$  with respect to  $\theta(\lambda \otimes \mu)$ ). Since the density for  $\theta(\Gamma)$  with respect to the same measure is  $\tilde{\gamma}$ , we see that the Radon-Nikodym derivative  $d\theta(\Gamma)/dT(\theta(\Gamma))$  is  $\tilde{\gamma}(x, gx)/\varphi(g)\tilde{\gamma}(gx, x)$  at  $(x, gx) \in E$ .  $\square$

We will now restate some results of Tierney (1998) for use in the following proofs.

**Proposition 2** (Tierney, 1998, Proposition 1). *Let  $\mu(dx, dy)$  be a sigma-finite measure on the product space  $(E \times E, \mathcal{E} \otimes \mathcal{E})$  and let  $\mu^T(dx, dy) = \mu(dy, dx)$ . Then there exists a symmetric set  $R \in \mathcal{E} \otimes \mathcal{E}$  such that  $\mu$  and  $\mu^T$  are mutually absolutely continuous on  $R$  and mutually singular on the complement of  $R$ ,  $R^C$ . The set  $R$  is unique up to sets that are null for both  $\mu$  and  $\mu^T$ . Let  $\mu_R$  and  $\mu_T^R$  be the restrictions of  $\mu$  and  $\mu^T$  to  $R$ . Then there exists a version of the density*

$$r(x, y) = \frac{\mu_R(dx, dy)}{\mu_T^R(dx, dy)}$$

such that  $0 < r(x, y) < \infty$  and  $r(x, y) = 1/r(y, x)$  for all  $x, y \in E$ .

**Proposition 3** (Tierney, 1998, Theorem 2). *A Metropolis-Hastings transition kernel satisfies the detailed balance condition Eq. (1) if and only if the following two conditions hold.*

- (i) *The function  $\alpha$  is  $\mu$ -almost everywhere zero on  $R^C$ .*
- (ii) *The function  $\alpha$  satisfies  $\alpha(x, y)r(x, y) = \alpha(y, x)\mu$ -almost everywhere on  $R$ .*

The Metropolis-Hastings acceptance probability

$$\alpha(x, y) = \begin{cases} \min\{1, r(y, x)\}, & \text{if } (x, y) \in R, \\ 0, & \text{if } (x, y) \notin R. \end{cases}$$

satisfies these conditions by construction.

## Proofs of Theorems 1 and 2

*Proof of Theorem 1.* Procedure 1 describes an MH kernel based on the proposal  $Q'(dw' | w)$  that, given a state  $w$ , samples  $g \sim Q_G(\cdot | w)$  and proposes  $gw$ . In other words,  $Q'(\cdot | w)$  is the push-forward of  $Q_G(\cdot | w)$  under the map  $g \mapsto gw$ , making  $P(dw)Q'(dw' | w)$  the push-forward of  $P(dw)Q_G(dg | w)$  under the map  $\theta(w, g) = (w, gw)$ . We can now apply Theorem 3 by taking  $\Gamma(dw, dg) := P(dw)Q_G(dg | w)$  with density  $\gamma(w, g) = p(w)q(g | w)$ , so that  $P(dw)Q'(dw' | w) = \theta(\Gamma)$  and

$$\begin{aligned} r(w, gw) &:= \frac{d\theta(P(dw)Q_G(dg | w))}{dT(\theta(P(dw)Q_G(dg | w)))}(w, gw) \\ &= \frac{\Delta_r^G(g)\tilde{\gamma}(w, gw)}{\chi(g)\tilde{\gamma}(gw, w)} \quad \text{where } w \in W, g \in G \end{aligned}$$

where

$$\begin{aligned} \tilde{\gamma}(w, gw) &= \int_{G_x} p(w)q(gh | w)\beta_x(dh) \\ &= p(w) \int_{G_x} q(gh | w)\beta_x(dh) \\ &= p(w)q'(g | w). \end{aligned}$$

Define

$$R := \{(w, gw) \in E \mid p(w)q'(g | w) > 0 \text{ and } p(gw)q'(g^{-1} | gw) > 0\}.$$

Now the image of  $\theta$  is  $E$ , so both  $\theta(\Gamma)$  and  $T(\theta(\Gamma))$  are zero outside  $E$ . Thus they are mutually singular outside  $R \subset E$  and mutually absolutely continuous on  $R$ . We can define  $r(w, w') = 1$  outside  $R$ , and by inspection we can verify that  $r(w', w) = 1/r(w, w')$ . Thus we have satisfied all the conditions for Proposition 2 and by Proposition 3 the MH kernel with acceptance probability  $\alpha(w, w') := \min\{1, r(w', w)\}$  on  $R$  satisfies detailed balance. Since we assume that the initial state is within the support of  $P$ , and the acceptance probability is always zero for proposals outside the support,  $\alpha$  will never be evaluated outside the set  $R$ .  $\square$

*Proof of Theorem 2.* Procedure 2 describes an MH kernel based on a proposal  $Q'$  which is a mixture of the types of proposals seen in Procedure 1:  $Q'(dw' | w) = \sum_{i=1}^n a(i | w)Q'_i(dw' | w)$  and  $P(dw)Q'(dw' | w) = \sum_{i=1}^n a(i | w)P(dw)Q'_i(dw' | w)$ . Now define  $\Gamma_i(dw, dg) = a(i | w)P(dw)Q'_i(dg | w)$ . By a similar argument to the previous proof it follows that  $P(dw)Q'(dw' | w) = \sum_{i=1}^n \theta(\Gamma_i)$ . As before, we can define a function  $r_i$  that is a Radon-Nikodym derivative for  $d\theta(\Gamma_i)/dT(\theta(\Gamma_i))$  restricted to a set  $R_i$  where both those measures are mutually absolutely continuous, and mutually singular outside it. Since  $\theta(\Gamma_i)$  is zero outside the set  $E_i := \theta(W, G_i)$ , we see that  $R_i \subset E_i$ . The problem arises because the  $E_i$  may not be disjoint. However, we will show that we can take the  $R_i$  to be disjoint without loss of generality.

For each  $1 \leq i \leq n$ , define  $V_i$  to contain all the  $1 \leq j \leq n$  such that Assumption 3 is satisfied for  $i$  and  $j$  with  $k = i$ . Now for any  $j \in V_i$  the pre-image of  $E_i \cap E_j$  under  $\theta$  is  $\{(w, g) \mid w \in W, g \in G_{i,j}G_i, w\}$ . Applying the assumption, this set has zero measure under  $\Gamma_i$  so  $E_i \cap E_j$  has zero measure under  $\theta(\Gamma_i)$ . Then  $\bigcup_{j \in V_i} E_i \cap E_j$  has zero measure under  $\theta(\Gamma_i)$  and is symmetric, so it has zero measure under  $T(\theta(\Gamma_i))$  as well. Thus, without loss of generality, we can take  $R_i$  to be a subset of  $E_i \setminus \bigcup_{j \in V_i} E_j$  since it is only unique up to  $\theta(\Gamma_i)$ -null sets. By the assumption, for any  $i \neq j$  either  $i \in V_j$  or  $j \in V_i$ , so the  $R_i$  are disjoint. We have found a collection of disjoint sets  $R_i$  such that each  $\theta(\Gamma_i)$  is mutually absolutely continuous on  $R_i$  and mutually singular outside  $R_i$ , with  $d\theta(\Gamma_i)/dT(\theta(\Gamma_i)) = r_i$  restricted to

$R_i$ . We can now define  $r$  so that it takes on the value  $r_i$  on  $E_i$ , with  $R := \bigcup_{i=1}^n R_i$ . This  $r$  is the Radon-Nikodym derivative for Tierney's Proposition 1.

It only remains to note that by Assumption 3 for any  $w$  in the support of  $P$  and  $w' = gw$  sampled according to  $Q_i(\cdot | w)$ ,  $(w, gw) \in R_i$  with probability 1. Thus if the algorithm samples from some  $Q_i$  then  $r$  is evaluated on  $E_i$  with probability 1.  $\square$
